# Supplementary material for: Channels of Evolution: Unveiling Evolutionary Patterns in Diatom Ca2+ Signalling
Source: MDPI journal article supplement (doi:10.3390/plants13091207), 2024-04-26
Supplement: s1 [file s1]

## Supplementary Data S5: Sequence information for pPha-T1-Venus vector

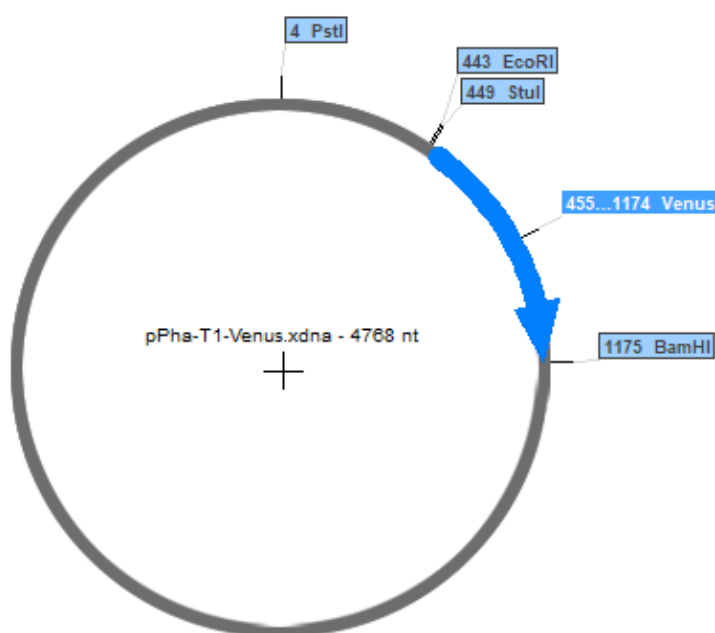

### pPha-T1-Venus

A codon optimised Venus gene was synthesised and cloned into pPha-T1 via *EcoRI* and *BamHI*. Cutting with *PstI* and *StuI* removes the *fcpA* promoter, allowing the gene of interest (without stop codon) and its native promoter to be inserted in frame with Venus. This results in expression of the gene of interest with a C-terminal Venus fusion.

The entire sequence is shown below. *PstI* and *StuI* sites are underlined and the Venus coding sequence is shaded.

### >pPha-T1-Venus

```
GGGCTGCAGGACGCAATGGAGGATTATCACCGCAAAAATGAACTTCGAAAAAACTTTTCGAGCGACCA
TGGAAAAGGAGGATCAGATTTCAGATTACAACAGTGGATTGCTCTGGTAGCAAATATCTTCTGCTAGAT
TGGCTCATGGTCGGTTTTTGGACGTTCTGAAGCTCACCGTCAAAGAAACAAAAGAGAAGAATGACGTCT
TCGTGACGTAGAATCTACGACTGTACTCGGATCTGGGAAATGAATTGACTCACGGTCTTCTTCGAGTC
CTGTTACAGGCCCTTGGTCCGAACCCCCACACGATTTTTGCACCAAAGATTTGCTTCAATTTGCTGGA
TGTTTTGACTGCAAGATCAGCTGGCCTAGCAAGAGTGCTCGTGTGCTTCGTCGGGAATCCCTACGAA
TTTCAGTTCTGCACAAATTTGTCTGCCGTTTCGAGAATTCAGGCCTATGGTTTTCCAAGGAGAAGAAC
TCTTCACCGGTGTCGTCCCCATTCTCGTCGAACTCGACGGAGACGTCAACGGTCACAAGTTTTTCGGTC
TCCGGCGAAGGAGAAGGTGACGCCACCTACGGCAAGCTCACCTCAAGCTCATCTGCACCACCGGAAA
GTTGCCGGTCCCCCTGGCCGACCTTGGTCAACACCTTGGGATACGGACTCCAGTGCTTCGCCCCGCTACC
CCGACCACATGAAGCAGCACGACTTCTTTAAGTCCGCCATGCCCGAAGGATACGTCCAGGAACGTACC
ATTTTCTTTAAGGACGACGGTAACATAAGACCCGCGCCGAAGTCAAGTTCGAAGGTGACACCCTCGT
CAACCGTATTGAACTCAAGGGCATCGACTTTAAGGAAGACGGCAACATCCTCGGACACAAGCTCGAAT
ACAACATACTCCCAACAGTCTACATTACCGCCGACAAGCAGAAGAACGGAATCAAGGCCAACTTC
```

AAGATTTCGCCACAACATCGAAGACGGAGGTGTCCAGCTCGCCGACCACTACCAGCAGAACACCCCGAT  
TGGAGATGGACCGGTCTCTCTCCCGACAACCACTACCTCTCCTACCAGTCCAAGCTCTCCAAGGACC  
CCAACGAAAAGCGTGACCACATGGTCTCTCGAATTTGTCAACGCCGCCGGTATCACCTTGGGAATG  
GACGAACTCTACAAGTGAGGATCCTCTAGAGCTTCAGAAGCGTGCTATCGAACTCAACCAGGGACGTG  
CGGCACAAATGGGCATCCTTGCTCTCATGGTGCACGAACAGTTGGGAGTCTCTATCCTTCCTTAAAA  
TTTAATTTTTCATTAGTTGCAGTCACTCCGCTTTGGTTTTACAGTCAGGAATAAACTAGCTCGTCTTC  
ACCATGGATGCCAATCTCGCCTATTCATGGTGTATAAAAGTTCAACATCCAAAGCTAGAACTTTTGG  
AAGAGAAAGAATATCCGAATAGGGCACGGCGTGCCGTATTGTTGGAGTGGACTAGCAGAAAGTGAGGA  
AGGCACAGGATGAGTTTTCTCGAGACATACTTCAGCGTCGTCTTCACTGTCACAGTCAACTGACAGT  
AATCGTTGATCCGGAGAGATTCAAATTTCAATCTGTTTGGACCTGGATAAGACACAAGAGCGACATCC  
TGACATGAACGCCGTAAACAGCAAATCCTGGTTGAACACGTATCCTTTTGGGGGCTCCGCTACGACG  
CTCGCTCCAGCTGGGGCTTCCTTACTATACACAGCGCGCATATTTACGGTTGCCAGATGTCAAGATG  
GCCAAGTTGACCAGTGCCGTTCCGGTGCTCACC CGCGCGACGTGCGCGGAGCGGTGAGTTCTGGAC  
CGACCGGCTCGGGTTCTCCCGGACTTCGTGGAGGACGACTTCGCCGGTGTGGTCCGGGACGACGTGA  
CCCTGTTTCATCAGCGCGGTCCAGGACCAGGTGGTGCCGGACAACACCCTGGCCTGGGTGTGGGTGCGC  
GGCCTGGACGAGCTGTACGCCGAGTGGTCCGAGGTGCTGTCCACGAACTTCGGGGACGCCTCCGGGCC  
GGCCATGACCGAGATCGGCGAGCAGCCGTGGGGGCGGGAGTTGCCCCGCGCGACCCGGCCGGCAACT  
GCGTGCACTTCGTGGCCGAGGAGCAGGACTGAACCTTCCTTAAAAATTTAATTTTCATTAGTTGCAGT  
CACTCCGCTTTGGTTTTACAGTCAGGAATAAACTAGCTCGTCTTCACCATGGATGCCAATCTCGCCT  
ATTCATGGTGTATAAAAGTTCAACATCCAAAGCTAGAACTTTTGGAAAGAGAAAGAATATCCGAATAG  
GGCACGGCGTGCCGTATTGTTGGAGTGGACTAGCAGAAAGTGAGGAAGGCACAGGATGAGTTTTCTCG  
AGGCCGGTCTCCCTATAGTGAGTCGTATTAATTTTCGATAAGCCAGGTTAACCTGCATTAATGAATCGG  
CCAACGCGCGGGGAGAGGCGGTTTGCATATTGGGCGCTCTTCGCTTCCTCGCTCACTGACTCGCTGC  
GCTCGTTCGTTCCGCTGCGGCGAGCGGTATCAGCTCACTCAAAGGCGGTAATACGGTTATCCACAGAA  
TCAGGGGATAACGCAGGAAAGAACATGTGAGCAAAAGGCCAGCAAAAGGCCAGGAACCGTAAAAAGGC  
CGCGTTGCTGGCGTTTTTTCATAGGCTCCGCCCCCTGACGAGCATCACAAAATCGACGCTCAAGTC  
AGAGGTGGCGAAACCCGACAGGACTATAAAGATACCAGGCGTTTTCCCCCTGGAAGCTCCCTCGTGCGC  
TCTCCTGTTCCGACCCTGCCGCTTACCGGATACCTGTCCGCTTTCTCCCTTCGGGAAGCGTGCGCT  
TTCTCAATGCTCACGCTGTAGGTATCTCAGTTCGGTGTAGGTGCTTCGCTCCAAGCTGGGCTGTGTGC  
ACGAACCCCCCGTTTCAGCCCCGACCGCTGCGCCTTATCCGGTAACTATCGTCTTGAGTCCAACCCGGTA  
AGACACGACTTATCGCCACTGGCAGCAGCCACTGGTAACAGGATTAGCAGAGCGAGGTATGTAGGCGG  
TGCTACAGAGTTCTTGAAGTGGTGGCCTAACTACGGCTACACTAGAAGGACAGTATTTGGTATCTGCG  
CTCTGCTGAAGCCAGTTACCTTCGGAAAAAGAGTTGGTAGCTCTTGATCCGGCAAACAAACCACCGCT  
GGTAGCGGTGGTTTTTTTTGTTTGCAAGCAGCAGATTACGCGCAGAAAAAAGGATCTCAAGAAGATCC  
TTTGATCTTTTCTACGGGGTCTGACGCTCAGTGGAACGAAAACCTCACGTTAAGGGATTTTGGTCATGA  
GATTATCAAAAAGGATCTTCACCTAGATCCTTTTAAATTAATAAATGAAGTTTTAAATCAATCTAAAGT  
ATATATGAGTAAACTTGGTCTGACAGTTACCAATGCTTAATCAGTGAGGCACCTATCTCAGCGATCTG  
TCTATTTTCGTTTCATCCATAGTTGCCTGACTCCCCGTCGTGTAGATAACTACGATACGGGAGGGCTTAC  
CATCTGGCCCCAGTGCTGCAATGATACCGCGAGACCCACGCTCACC GGCTCCAGATTTATCAGCAATA  
AACCAGCCAGCCGGAAGGGCCGAGCGCAGAAGTGGTCTGCAACTTTATCCGCCTCCATCCAGTCTAT  
TAATTGTTGCCGGAAGCTAGAGTAAGTAGTTCGCCAGTTAATAGTTTGCGCAACGTTGTTGCCATTG  
CTACAGGCATCGTGGTGTACGCTCGTCTGTTGGTATGGCTTCATTACGCTCCGGTTCCCAACGATCA  
AGGCGAGTTACATGATCCCCATGTTGTGCAAAAAGCGGTTAGCTCCTTCGGTCTCCGATCGTTGT  
CAGAAGTAAGTTGGCCGAGTGTTATCACTCATGGTTATGGCAGCACTGCATAATTCTCTTACTGTCA  
TGCCATCCGTAAGATGCTTTTCTGTGACTGGTGAGTACTCAACCAAGTCATTCTGAGAATAGTGTATG  
CGGCGACCGAGTTGCTCTTGCCCGGCGTCAATACGGGATAATACCGCGCCACATAGCAGAACTTTAAA  
AGTGCTCATCATTTGGAACGTTCTTCGGGGCGAAAACCTCTCAAGGATCTTACCGCTGTTGAGATCCA  
GTTTCGATGTAACCACTCGTGCAACCAACTGATCTTCAGCATCTTTTACTTTTACCAGCGTTTCTGGG  
TGAGCAAAAACAGGAAGGCAAAATGCCGCAAAAAGGGAATAAGGGCGACACGGAAATGTTGAATACT  
CATACTCTTCCTTTTTCAATATTATTGAAGCATTTATCAGGGTTATTGTCTCATGAGCGGATACATAT  
TTGAATGTATTTAGAAAAATAAACAAATAGGGGTTCCGCGCACATTTCCCCGAAAAGTGCCACCTGAC

GTCTAAGAAACCATTTATTATCATGACATTAACCTATAAAAAATAGGCGTATCACGAGGCCCTTTCGTCT  
CGCGCGTTTTCGGTGATGACGGTGAAAACCTCTGACACATGCAGCTCCCGGAGACGGTCACAGCTTGTC  
TGTAAGCGGATGCCGGGAGCAGACAAGCCCGTCAGGGCGCGTCAGCGGGTGTTGGCGGGTGTCGGGGC  
TGGCTTAACCTATGCGGCATCAGAGCAGATTGTACTGAGAGTGCACCATATGGACATATTGTCGTTAGA  
ACGCGGCTACAATTAATACATAACCTTATGTATCATAACATACGATTTAGGTGACACTATAGAACCA  
GATCCCCC
